# Supplementary material for: Retinopathy of prematurity: a review of epidemiology and current treatment strategies
Source: PubMed Central journal article supplement — Clin Exp Pediatr. 2021 Oct 12;65(3):115–26. doi: 10.3345/cep.2021.00773 (PMC8898617; doi:10.3345/cep.2021.00773), 2021-10-12
Supplement: cep-2021-00773-suppl.pdf [file cep-2021-00773-suppl.pdf]

**Supplementary Table 1. Annual incidence of ROP among very low birth weight infants according to the Korean Neonatal Network between 2014 and 2018.<sup>29)</sup>**

| Year | Total             | Stage   |         |         |         |         | GA (wk) |       |       |      |
|------|-------------------|---------|---------|---------|---------|---------|---------|-------|-------|------|
|      |                   | Stage 1 | Stage 2 | Stage 3 | Stage 4 | Stage 5 | ≤24     | 25-28 | 29-32 | >32  |
| 2014 | 33.5% (598/1,784) | 10.8%   | 11.3%   | 11.1%   | 0.3%    | 0%      | 88.9%   | 53.2% | 12.8% | 3.3% |
| 2015 | 32.3% (659/2,040) | 11.7%   | 9.8%    | 10.6%   | 0.2%    | 0%      | 91.2%   | 47.6% | 14.3% | 3.7% |
| 2016 | 29.6% (588/1,986) | 9.8%    | 8.6%    | 10.9%   | 0.2%    | 0.1%    | 88.4%   | 47.6% | 12.7% | 3.4% |
| 2017 | 32.0% (580/1,814) | 11.4%   | 9.0%    | 11.3%   | 0.3%    | 0%      | 88.2%   | 48.2% | 16.2% | 2.7% |
| 2018 | 33.9% (614/1,811) | 9.8%    | 11.2%   | 12.6%   | 0.3%    | 0.1%    | 84.1%   | 54.8% | 13.7% | 4.6% |
